# Supplementary material for: Utilising the left-helical conformation of L-DNA for analysing different marker types on a single universal microarray platform
Source: PubMed Central journal article supplement — Nucleic Acids Res. 2006 Sep 20;34(18):5101–11. doi: 10.1093/nar/gkl671 (PMC1636439; doi:10.1093/nar/gkl671), 2006-09-20

## SUPPLEMENTARY MATERIAL

**Table S1.** Sequences of the ZIP-code oligonucleotides used in the analyses described.

**Table S2.** ORF identifiers, trivial names and brief description of the 20 *Candida albicans* genes, whose variations in transcript levels between bastospore and hyphal growth are presented in Fig. 6.

**Table S3.** Sequences of primer pairs used for the amplification of the genomic regions of 21 SNPs from a case-control study on hay-fever. Also, the sequences of oligonucleotides are shown that were used as a control for the SNP-typing reaction, acting as a heterozygous template.

**Figure S1.** Quantification of the amount of oligonucleotide that was attached to an array surface. At each spot, a mixture of an excess of a D-formed oligonucleotide and a small quantity of the L-DNA ICP-sequence (ICP, 5'-TTCGGCTGTGAGAACGATCACGCA) was applied. Subsequently, the relative amount of oligonucleotide attached at each spot position was analysed by hybridisation of the fluorescence-labelled L-DNA complement of the ICP oligonucleotide. On the left half of the slide, the same pattern of D-formed ICP had been spotted. The hybridisation image shows that binding occurred only at positions of the L-DNA ICP. The relevant signal intensities were quantified and are shown in the panels on the right. At four spot positions, attachment had failed, so hybridisation produced only signals of or slightly above background, which is indicated by a horizontal line.

**Table S1**

| <b>ZIP-Code Sequence</b> | <b>Molecule Mass</b> |
|--------------------------|----------------------|
| AGCGAGCGGGAACAGGCCAA     | 7155.63              |
| GGAACACCACGCAGCGCAGG     | 7092.32              |
| GCAGTGCTCACCGTCCGCGA     | 7019.80              |
| CGGAGTGGCACCAGCGGGAA     | 7159.22              |
| GCAGCAGGCCAAAGCGAGCG     | 7128.12              |
| GTCCGAGCCCTCACGCAGCG     | 7015.10              |
| GCAGGACGACGCGGGTGGAA     | 7202.40              |
| TGGCGGTCTGCTGAGCGGTC     | 7128.12              |
| GTGGGTCCCGGAAGCGTGCT     | 7137.68              |
| GCCTCGAGCCAACACCGCCT     | 6961.82              |
| TGGCCGGACAGGAGACACGC     | 7124.53              |
| GCCTGCCTTCACGAGCCCAA     | 6974.81              |
| GTGGGCGAAGCGGGAACCTC     | 7141.50              |
| CGGAGCGATCACGTGGCACC     | 7075.64              |
| ACGCGACGCACCTGCTCCAA     | 6981.90              |
| CCTCCCTCACGCGCCTGCAG     | 6925.26              |
| GTGGACTGAGCGCGGATGGC     | 7197.60              |
| CGAGGCAGACGCGTCCCACC     | 7023.36              |
| TGGCCGAGACTGCAGGAGCG     | 7159.22              |
| AGCGGACGACTGCGGACGAG     | 7167.60              |
| GCCTGCGAAGACCCAAGCGA     | 7067.31              |
| GAGCAGCGACGCCGAGGCAG     | 7147.25              |
| GCGAGTCCCGAGGGTCCCAA     | 7075.64              |
| GGAAAGCGAGCGGCAGCCAA     | 7167.60              |
| TGGCGGAACAGGACTGCGGA     | 7173.60              |
| TGGCGGGTTGCTCCTCGTGG     | 7111.40              |
| GACGGCCTTGCTAGCGCGGA     | 7103.05              |
| GCCTGCAGTGCTGGTCCGGA     | 7093.51              |
| CCTCCGGAAGACCCTCGCGA     | 6993.74              |
| GCGAGCAGCAGGGTGGACCA     | 7165.21              |
| GCCTGAGCAGACGGTCCGGA     | 7117.37              |
| GGGTGCCTAGCGGTCCAGCG     | 7122.14              |
| CAGGACGCACCAACGCCCAA     | 6993.74              |
| AGCGCACCCGGAACCTGGAGC    | 7087.55              |
| ACGCGTGGACTGCCTCGAGC     | 7068.50              |
| ACGCCCTCCCAACCTCACGC     | 6879.40              |
| CACCGCAGCTCCCAACCAA      | 6908.78              |
| GGGTGGCGGAAGGTCGACG      | 7231.25              |
| GCGAGCGAACCAGAGCGACG     | 7132.90              |
| TGGCAGCGTCACGGGTCACC     | 7066.12              |
| GGGTGACGAGCGCCAAGCCT     | 7114.98              |
| GCGATGGCAGCGGTGGAGAC     | 7195.19              |
| GCAGGCGATGGCTCACGACG     | 7120.95              |
| GTCTGCTGTGGGCGATGGC      | 7132.90              |
| GGTCGTCCGGTCGCCTTGCT     | 7049.50              |
| ACCAAGCGGCCTCCTCGTCC     | 6946.48              |
| ACGCGGAAGGTCTGGCCAGG     | 7152.04              |
| CCAACGGAGCGACGAGCAGG     | 7141.30              |
| CGGACAGGGACGGCGATCAC     | 7118.56              |

|                       |         |
|-----------------------|---------|
| GGTCGGGTCAGGCCTCGGAA  | 7147.25 |
| CGGAAGCGCGAGACCACACC  | 7048.29 |
| TCACCCTCTGGCGGAACGGA  | 7061.40 |
| CCAAAGACAGCGGACGGCGA  | 7113.79 |
| GGGTGGGTCGAGGCCTGGTC  | 7190.39 |
| CGGAGTCCTGGCAGCGTGGC  | 7129.30 |
| GCGAAGCGACCAAGACCGGA  | 7110.21 |
| CAGGCACCCACCGGAAGAC   | 7012.70 |
| GTCCGCAGCCAACCAAACGC  | 6990.19 |
| GCAGAGCGTGGCCGAGGTCC  | 7136.48 |
| GTGGCGGACGGACGAGTGGC  | 7214.40 |
| GCAGGTGGGACGGGTCCGGT  | 7238.60 |
| AGACAGCGGCGAGAGCGGGT  | 7206.00 |
| CGAGAGCGGTCCCGGAGGTCC | 7134.09 |
| CCTCCGAGCACCGACGACGC  | 6981.91 |
| ACGCCCAAACGCAGACCCAA  | 6983.09 |
| GGTCCAGGTGGCGGTTCGAGC | 7165.21 |
| AGCGTCACGAGCCAGGCGGA  | 7128.12 |
| GAGCGTGGCGGAGGTCCGGT  | 7203.59 |
| GACGGCGAGGGTGCAGGCAG  | 7227.60 |
| CCTCGACGGTCCCTGGCTGGC | 7032.80 |
| GAGCTGCTTGGCGCGACACC  | 7066.12 |
| GCGACAGGCGGAGAGCGGAA  | 7216.80 |
| GCAGTGGCGTCCGGGTGAGC  | 7159.20 |
| CGAGGGAAGTGGGCAGCGGA  | 7242.20 |
| TGGCGAGCGCAGTGGCAGAC  | 7150.80 |
| CGAGGCCTGCAGGGAAAGCG  | 7162.81 |
| CGAGGTCCGGGTGCGAGAGC  | 7167.60 |
| GTGGGAGCGACGCAGGGCAG  | 7215.61 |
| GGGTGCAGGCCTGTGGGTCC  | 7152.04 |
| GCCTACGCGAGCGACGGAGC  | 7097.08 |
| CACCGAGCTGCTGCCTTGGC  | 7016.24 |
| GGGTGGAAGCGGAGCGTGG   | 7275.85 |
| CAGGCCAAGCAGACGCGACG  | 7089.9  |
| GCGAGGGTGCAGGGTTGCT   | 7218.00 |
| AGCGGTCCGACGGCCTTCAC  | 7020.98 |
| GTCCCGAGGCAGCGAGAGCG  | 7142.46 |
| GCAGTCACGGTCAGCGGCCT  | 7067.31 |
| GACGCCAACGGACGGAGGGT  | 7164.01 |
| TCACGCGACACCCGGACACC  | 6963.00 |
| CGAGCGGAGAGCGAGCCAGG  | 7192.79 |
| AGCGTGCTGGTCTGTTGGCCT | 7128.12 |
| AGCGCCAAGGGTCCCTCGGGT | 7111.40 |
| CCAAAGCGAGACCGGAGCGA  | 7116.17 |
| GACGCACCGAGCACGCACCA  | 7012.69 |
| TCACCCAAGACGGCAGGCGA  | 7064.93 |
| GGGTGGTCCGGAGCGAGCAG  | 7214.40 |
| CCTCAGACGGGTAGCGGCGA  | 7128.10 |
| GGAAGCAGCACCCGAGGCCT  | 7088.70 |
| CCTCGTCCGTCCGGTACCA   | 6931.70 |
| GGGTGTGGACGCGGAAGCAG  | 7248.10 |
| CGGAGAGCCCAAACGCGCAG  | 7089.40 |
| ACGCGGTCCGAAGGGTGGTC  | 7183.80 |

**Table S2**

| <b>ORF Id.</b> | <b>Name</b> | <b>Description</b>                                         |
|----------------|-------------|------------------------------------------------------------|
| orf19.4906     |             | putative cell wall protein                                 |
| orf19.5742     | ALS9        | agglutinin-like protein 9                                  |
| orf19.1346     | HYR6        | hyphally regulated cell wall protein                       |
| orf19.1816     | ALS3        | agglutinin-like protein 3                                  |
| orf19.715      |             | hypothetical protein                                       |
| orf19.3618     | CWP1        | putative cell wall protein                                 |
| orf19.138      | FIG1        | integral membrane protein required for efficient mating    |
| orf19.5188     | CHS1        | chitin synthase                                            |
| orf19.4361     | HYR2        | hyphally regulated protein precursor                       |
| orf19.1690     | TOS1        | conserved hypothetical protein                             |
| orf19.1321     | HWP1        | hyphal wall protein                                        |
| orf19.2767     |             | hypothetical protein                                       |
| orf19.6420     |             | hypothetical membrane protein                              |
| orf19.7030     | CCW14       | cell wall mannoprotein   secretory stress response protein |
| orf19.5007     | ACT1        | actin                                                      |
| orf19.7218     | PRY2        | putative cell wall protein                                 |
| orf19.930      | PET9        | ATP/ADP translocator                                       |
| orf19.7114     |             | putative cell wall protein                                 |
| orf19.7362     | SKN1        | glucan synthase subunit involved in cell wall assembly     |
| orf19.6771     | UBI1        | polyubiquitin involved in stress response system           |

**Table S3**

| <b>No.</b>   | <b>Forward Primer</b>   | <b>Reverse Primer</b> | <b>Lenght/nt</b> |
|--------------|-------------------------|-----------------------|------------------|
| SNP 8, 9, 10 | TGCCCCTCCCAGTCTAGTTCT   | GCATCAAGGATACCCCTCACA | 226              |
| SNP 2        | AACTCCTGTCTTGCATTGCA    | TTCCATTCAAATCATCTG    | 142              |
| SNP 13       | TGCTGATTGGCCCCAAGT      | TTTGCAGTGACAATGTGAGGC | 168              |
| SNP 20       | TTCCTTAGGTTGAGCTGGAGG   | GTTCCATGCATTACGAGGAGC | 164              |
| SNP 24       | TGCCTTGAGGAGAAAAGAGCT   | TCGTTTCAGCCTCTCACCTCT | 151              |
| SNP 26       | GGAATGGGAAGCAGCTCAAG    | AACAGGAATTTGGGGCTTTG  | 143              |
| SNP 30       | GGGTTGTGTGTTTATTTCACT   | CCTGACACATTCAAGTTCTG  | 143              |
| SNP 31       | TTCAGACATTCACAATTGA     | CCCAATGGTACAGGTTTT    | 163              |
| SNP 38       | AAAGCACACAACCTTGACCTG   | GGGTGACACCTGGAAGTTGTA | 144              |
| SNP 41       | TCGCCATCATGATAGCATCTG   | TGGAGTATGACGAAATTTTCT | 249              |
| SNP 42       | TTGCTTTGGTACAACATCC     | TGGTAACCGTGGTCTCAATA  | 221              |
| SNP 43       | CTTCCGTGAGGACTGAATGA    | TGCAAATAATGATGCTTTCGA | 238              |
| SNP 56       | CCTTCGTTAGAACACCCATGA   | AGACAGGGATTCTGGTTGTGA | 123              |
| SNP 61       | CCTGGAGTGCACGAAGTTGT    | ATAGATGGATGGGTGGGATG  | 150              |
| SNP 66       | CCCTCAACTCTTTCTCCCCTA   | CAGGTGGATGTTTACCAATGA | 142              |
| SNP 72       | TCCTTGTTTTTCAGCTGCCCTA  | GAGGGCTGATCCTACCACAAT | 257              |
| SNP 81       | GAGCAGTTAACCAGCTTGTCT   | TCACCTTGCTGCCTGCACATA | 207              |
| SNP 88       | TAGAGAAAACCCGAGCATGA    | TCCTAGGCCAATCTCACCTCA | 150              |
| SNP 90       | TTCTTTTCCGTTTTTGTGCAA   | GTGCTGTCTTGAATCCTCTGC | 150              |
|              |                         |                       |                  |
| Int-22-G     | CGATCACACGTGTGGGCTCTGCA |                       |                  |
| Int-22-A     | CGATTACACGTGTGGGCTCTGCA |                       |                  |

Figure S1

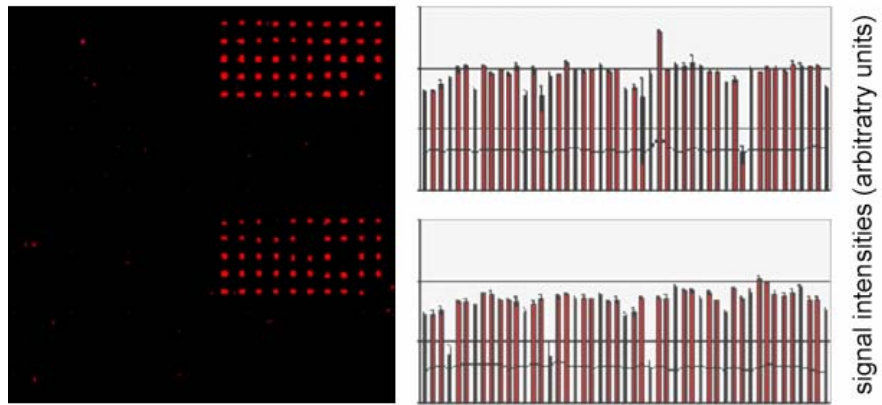

Supplement: nar_gkl671_1.pdf [file nar_gkl671_1.pdf]
